# Supplementary material for: LIS1 determines cleavage plane positioning by regulating actomyosin-mediated cell membrane contractility
Source: bioRxiv or medRxiv preprint supplement (doi:10.1101/751958), 2019-08-30
Supplement: Supplementary file [file media-1.pdf]

**Table S1. List of antibodies used for immunostaining and retrovirus plasmids****• Primary antibodies**

| Antibody name                       | Species | Vendor         | Dilution |
|-------------------------------------|---------|----------------|----------|
| Cleaved caspase3                    | rabbit  | Cell Signaling | 1:500    |
| $\alpha$ -Tubulin                   | rat     | AbD Serotec    | 1:1,000  |
| RhoA                                | mouse   | Santa Cruz     | 1:500    |
| Anillin                             | rabbit  | Santa Cruz     | 1:250    |
| P150 <sup>glued</sup>               | mouse   | BD bioscience  | 1:200    |
| DIC 74.1                            | mouse   | Millipore      | 1:100    |
| NMHCIIA                             | rabbit  | Covance        | 1:1,000  |
| GFP                                 | mouse   | Invitrogen     | 1:500    |
| MPM2                                | mouse   | Millipore      | 1:200    |
| N-Cadherin                          | mouse   | BD bioscience  | 1:100    |
| aPKC (PKC $\zeta$ )                 | rabbit  | Santa Cruz     | 1:100    |
| GFP                                 | chicken | Aves           | 1:500    |
| c-Myc<br>(detecting tdTomato-c-Myc) | goat    | Novus          | 1:150    |

**• Secondary antibodies**

| Antibody name                                         | Species                           | Vendor                         | Dilution |
|-------------------------------------------------------|-----------------------------------|--------------------------------|----------|
| Alexa Fluor 488-, 568-, 647-<br>conjugated antibodies | Donkey anti-mouse,<br>rabbit, rat | Invitrogen                     | 1:500    |
| Alexa Fluor 594-, 633-<br>conjugated phalloidin       |                                   | Invitrogen                     | 1:100    |
| Anti-GFP and c-Myc                                    | Donkey anti-chicken,<br>goat      | Jackson Immuno<br>Research Lab | 1:100    |

**• Retrovirus plasmid construction**

| Retrovirus plasmid          | Template plasmid                                   | Source                                                 | Other                                  |
|-----------------------------|----------------------------------------------------|--------------------------------------------------------|----------------------------------------|
| pCX-mCherry- $\alpha$ Tub   | pEGFP- $\alpha$ Tubulin<br>pRSET-mCherry           | Previously generated.<br>Moon et al., 2014             |                                        |
| pCX-MRLC1-GFP               | pEGFP-MRLC1                                        | Tom Egelhoff (Cleveland<br>Clinic, Cleveland, OH, USA) | Addgene plasmid<br>#35680              |
| pCX-SEPT6-GFP               | pEGFP-SEPT6                                        | Matthew Krummel (UCSF,<br>San Francisco, CA, USA)      | Described in<br>Gilden et al.,<br>2012 |
| pCX-H2B-tdTomato            | pCLNR-H2BG                                         | Geoffrey Wahl (Salk Institute,<br>San Diego, CA, USA)  | Addgene plasmid<br>#17735              |
|                             | pRSET-B-<br>tdTomato                               | Roger Tsien (UCSD, San<br>Diego, CA, USA)              |                                        |
| pCX-DN-RhoA,<br>pCX-CA-RhoA | pEGFP-DN-RhoA<br>(T19N)<br>pEGFP-CA-RhoA<br>(Q63L) | Kozo Kaibuchi (Nagoya<br>University, Nagoya, Japan)    |                                        |
